# Supplementary material for: Selective inactivation of hypomethylating agents by SAMHD1 provides a rationale for therapeutic stratification in AML
Source: Nat Commun. 2019 Aug 2;10:3475. doi: 10.1038/s41467-019-11413-4 (PMC6677770; doi:10.1038/s41467-019-11413-4)
Supplement: Supplementary file 3 — Supplementary Dataset 1 [file 41467_2019_11413_MOESM3_ESM.xlsx]

## Sheet: Tabelle1
Supplementary Data file 1
Characteristics of AML patients analysed in the data presented in Figure 6a-g.
	Age at diagnosis	Sex	Blast count	FAB	Karyotype	FISH analysis	Detected mutations (via PCR)
Patient #1 (A)	35	m	70	-	46, XY	-	NPM1 Exon 12, FLT3-ITD: ratio 0,975*
Patient #2 (B)	59	w	74	-	46,XX	-	NPM1 Exon 12, FLT3-ITD: ratio 1,042*
Patient #3 (C)	84	w	64	M5	46,XX	-	NPM1 Exon 12, FLT3-TKD**
Patient #4	63	m	70	-	46,XY	-	NPM1 Exon 12, FLT3-ITD: ration 0,939**
* Patients were screened for mutations in the following genes: NPM1, FLT3, RUNX1/RUNXT1, PML-RARA, CEBPA, BCR-ABL1, CBFb-MYH11
**Patients were screened for NPM1 and FLT3 mutations only.
Patient #5×	60	m	57	M4Eo	-	t(16; 16) 61%	CBFb-MYH11 [inv16 p13; q22]
Patient #6	51	m	48	M4	-	negative	IDH2 Exon 4 R140Q, FLT3-ITD (ratio 0.19)
Patient #7	41	m	70	M1	46,XY	-	KMT2A-PTD (MLL-PTD) [variant e9e3]
Patient #8	49	f	44	M4	47, XX, +4 [7], 47, XX, +21 [5], 48, XX, +4, +21 [4], 46, XX, [6]	-	IDH2 Exon 4 R172K
Patient #9	58	f	82	-	46, XX [5]	negative	NPM1, FLT3-ITD (ratio 0.57), IDH1 R132H, IDH2 R140Q
Patient #10	41	f	63	M2	46,XX	-	NPM1
Patient #11 (D)	72	f	83	M1	46, XX [20]	negative	IDH1 Exon 4 R132C
Patient #12	53	m	66	M1	46, XY	negative	NPM-1, FLT3 ITD (ratio 0.71)
Patietn #13	77	m	26	M4	46, XY	-	NPM1
Patient #14	40	m	73	-	46, XY ish del(17)q11q11 [20]	del17(q11q11) (NF1)	NPM1, FLT3-ITD (ratio 0.15), IDH1 R132H, IDH2 R140Q
Patient #15	57	f	25	M4	-	negative	IDH1 R131H, NPM1
Patient #16	73	f	81	M4	46, XX	-	NPM1 Exon 12, FLT3-ITD (ratio 2.3), IDH1 Exon 4 R132H
Patient #17	48	m	>30	-	46, XY	-	CEBPA (TAD1: 1bp insertion)
Patient #18	64	m	50	-	46, XY.ish del (17)(q11q11)(NF1-) [15], 46, XY [5]	NF1/17q deletion	CEBPA (TAD1: 2bp insertion), STAG2 mutation
Patient #19	86	f	66*	M2	46, XX [4]	-	NPM1, FLT3-ITD (ratio 0.28)
Patient #20	57	f	60	-	-	-	JAK2 V617 F, TP53
Patient #21	50	f	30	-	47, XX, + 19 [7], 46, XX [13]	19p13/19q13 insertion	CEBPA (TAD1: 1bp insertion)
Patient #22	58	f	74	M2	46, XX	-	NPM1
Patient #23	74	f	71	M1	46, XX, Inv(3)(p24q26), del(7)(p11p22) [20]	del(7p15)	-
Patient #24	67	m	80*	-	-	-	FLT-ITD (ratio 0.63), KMT2A-PTD (9e3)
Patient #25	65	m	83	-	46, XY	-	NPM1, FLT3-ITDhigh (ratio 0.66), FLT3-TKD
Patient #26	46	f	80	M2	-	-	CEBPA (TAD1: 1bp insertion), FLT-ITD (ratio 0.6), NPM1
Patient #27×	41	f	64	M4	46, XX	-	NPM1
Patients 7-64 were screened for mutations and translocations in the following genes: NPM1, FLT3, RUNX1/RUNXT1, PML-RARA, CEBPA, BCR-ABL1, CBFb-MYH11, KMT2A-ELL, -MLLT3,-T4, KMT2A-PTD; IDH1/2
× Patients were not screened for IDH 1 and 2 mutations
