# Supplementary material for: Selective inactivation of hypomethylating agents by SAMHD1 provides a rationale for therapeutic stratification in AML
Source: Nat Commun. 2019 Aug 2;10:3475. doi: 10.1038/s41467-019-11413-4 (PMC6677770; doi:10.1038/s41467-019-11413-4)
Supplement: Supplementary file 4 — Supplementary Dataset 2 [file 41467_2019_11413_MOESM4_ESM.xlsx]

## Sheet: Decitabine
Supplementary Data file 2
Characteristics of AML patients from the DAC-treated cohort analysed in the data presented in Figs. 6F-H.
Patient number	Age	SAMHD1 IHC score	SAMHD1 score (binary)	Best response	FAB	ELN cytogenetic risk
1	79	3	high	PD	-	adverse
2	72	3	high	PD	M4	adverse
3	83	3	high	PD	M1	adverse
4	73	2	high	PD	M0	intermediate II
5	73	3	high	CR	M4	intermediate II
6	64	2	high	PD	-	favorable
7	73	3	high	PD	M2	adverse
8	70	3	high	SD	M0	favorable
9	76	3	high	CR	M5	favorable
10	81	2	high	SD	-	adverse
11	79	2	high	SD	M2	intermediate II
12	73	2	high	PD	M1	-
13	73	2	high	CR	-	favorable
14	76	2	high	PD	-	intermediate II
15	77	3	high	PD	M2	adverse
16	70	2	high	SD	-	-
17	77	3	high	CR	M0	adverse
18	77	3	high	PD	-	adverse
19	71	2	high	SD	-	adverse
20	68	3	high	PD	M4	intermediate II
21	72	3	high	SD	M1	adverse
22	76	2	high	SD	M1	intermediate II
23	81	3	high	PD	M2	intermediate II
24	72	3	high	PD	-	favorable
25	70	2	high	PD	M6	adverse
26	76	2	high	SD	M1	intermediate I
27	81	1	low	CR	M2	intermediate II
28	76	0	low	PD	M0	intermediate II
29	76	0	low	CR	M5	intermediate I
30	70	0	low	CR	M4	intermediate II
31	71	0	low	CR	M5	favorable
32	77	1	low	PD	M4	adverse
33	83	1	low	PD	-	-
34	72	1	low	CR	M4	favorable
35	73	0	low	CR	-	intermediate I
36	79	1	low	CR	M7	adverse
37	85	0	low	SD	-	intermediate I
38	79	0	low	SD	M2	favorable
39	71	0	low	CR	M4	-
40	95	1	low	PD	-	-
41	82	1	low	SD	-	-
42	81	0	low	PD	M4	intermediate II
43	72	1	low	CR	M5	favorable
44	76	0	low	CR	M5	favorable
45	79	1	low	CR	M4	intermediate I
46	71	1	low	SD	-	-
47	67	0	low	SD	M1	favorable
48	71	0	low	CR	M4	intermediate I
49	75	0	low	SD	M2	adverse
50	76	1	low	PD	M0	adverse
51	81	0	low	SD	M5	adverse
52	68	1	low	CR	-	intermediate I
53	80	0	low	CR	M4	favorable
54	73	0	low	CR	-	-
55	83	1	low	PD	-	-

## Sheet: Azacytidine
Supplementary Table S4
Characteristics of AML patients from the AZA-treated cohort analysed in the data presented in Figs. 6F-H.
Patient number	Age	SAMHD1 IHC score	SAMHD1 score (binary)	Best response	FAB	ELN cytogenetic risk
1	70	2	high	PD	-	adverse
2	78	3	high	SD	-	adverse
3	70	2	high	PD	-	adverse
4	79	2	high	CR	-	intermediate I
5	67	2	high	CR	-	favorable
6	73	2	high	PD	-	adverse
7	82	2	high	PD	-	intermediate I
8	76	3	high	SD	-	-
9	72	3	high	SD	M4	intermediate-II
10	61	3	high	SD	-	intermediate-II
11	72	3	high	SD	-	adverse
12	64	2	high	SD	M1	adverse
13	67	2	high	PD	M2	intermediate II
14	71	2	high	CR	-	adverse
15	65	2	high	CR	M2	adverse
16	68	3	high	PD	M6	intermediate-II
17	67	3	high	CR	M5a	intermediate-II
18	78	2	high	CR	M4	intermediate I
19	81	2	high	SD	-	intermediate I
20	69	1	low	PD	-	intermediate II
21	89	1	low	PD	-	adverse
22	70	0	low	CR	M2	intermediate I
23	72	1	low	PD	M4	adverse
24	77	0	low	CR	M5	intermediate I
25	91	1	low	PD	M4	adverse
26	73	1	low	PD	-	intermediate II
27	74	0	low	CR	M4	intermediate I
28	80	1	low	PD	M5	intermediate II
29	82	0	low	CR	-	adverse
30	79	1	low	CR	-	intermediate I
31	79	1	low	PD	M1	adverse
32	63	0	low	SD	-	-
33	67	1	low	CR	M4	favorable
34	78	0	low	CR	M5	intermediate II
35	66	0	low	SD	M1	intermediate II
36	70	1	low	SD	M4	adverse
37	73	0	low	PD	M5	intermediate II
38	85	0	low	SD	M2	intermediate II
39	70	0	low	SD	M5	adverse
40	87	0	low	CR	M4	intermediate I
41	78	0	low	SD	M5	adverse
42	88	0	low	SD	M4	intermediate I
43	70	0	low	SD	-	intermediate II
44	81	0	low	PD	-	intermediate II
45	68	0	low	SD	M2	intermediate I
46	90	0	low	SD	-	intermediate I
47	69	0	low	SD	M1	favorable
48	67	1	low	PD	-	adverse
